# Supplementary material for: Supportive Versus Demanding Intervention Programs for Young Adults With Severe Mental Illness
Source: Atypon-hosted journal article supplement (doi:10.1176/appi.ps.201500071), 2015-08-03
Supplement: appi.ps.201500071.ds001.pdf [file appi.ps.201500071.ds001.pdf]

## STUDY SAMPLE, DESIGN AND DATA COLLECTION

### Questionnaires:

The following questionnaires were used (Cronbach's alpha values shown in brackets):

1. Socio-demographic questionnaire.
2. Program contribution questionnaire, comprising five questions and assessing the perceived contribution of different program components to the participant's well-being ( $\alpha=.84$ ). A four-level Likert scale was used, with 1 representing "I completely disagree" and 4 representing "I completely agree".
3. Mental wellbeing questionnaire, based on and translated to Hebrew from a standard recovery questionnaire (1). Five dimensions were assessed: personal confidence and hope (9 items;  $\alpha=.73$ ); willingness to ask for help (3 items;  $\alpha=.88$ ); goal- and success-orientation (5 items;  $\alpha=.75$ ); reliance on others (4 items;  $\alpha=.80$ ); and the sense that the individual is not dominated by the symptoms of the illness (3 items;  $\alpha=.74$ ). A five-level Likert scale was used, with 1 representing "I completely disagree" and 5 representing "I completely agree".
4. An employment performance questionnaire ( $\alpha=.78$ ) including 11 items. A five-level Likert scale was used, with 1 representing "I completely disagree" and 5 representing "I completely agree".
5. Open-ended questions assessing subjective aspects of the program, e.g., the degree to which different program components promote or hinder the participant; the degree to which the participants feels that he or she achieve personal goals; and the degree to which the program has an impact on the participant's life. This section was usually completed with the assistance of a researcher.

**Supplementary Table 1: Similarities and differences between the SMP and DMP**  
(relevant references in parentheses)

|                                                |                         | <b>Supportive Model Program (SMP)</b>                                                                                                                      | <b>Demanding Model Program (DMP)</b>                                                                                                                        |
|------------------------------------------------|-------------------------|------------------------------------------------------------------------------------------------------------------------------------------------------------|-------------------------------------------------------------------------------------------------------------------------------------------------------------|
| Recruitment criteria                           |                         | Young adults (18-30 years old) with SMI; at least 40% mental disability (2, 3)                                                                             |                                                                                                                                                             |
| Community-based approach                       |                         | Emphasizing integration within the community (4)                                                                                                           |                                                                                                                                                             |
| Illness Management & Recovery approach         | Staff                   | A multidisciplinary team assisting participants to regain independence and responsibility of their lives, while encouraging respect, hope and optimism (5) |                                                                                                                                                             |
|                                                |                         | Supportive and empathetic (6)                                                                                                                              | Encouraging independent functioning through personal experience (7)                                                                                         |
|                                                | Individual aspects      | A personal and vocational plan constructed with each participant (6, 8-11)                                                                                 |                                                                                                                                                             |
|                                                | Group aspects           | Communal learning (12-14) *                                                                                                                                | Emphasis on peer-support, belonging and interpersonal relationships, e.g., through shared responsibilities for holding social activities (4, 8, 11, 14, 15) |
| Acquisition of coping skills                   |                         | Formal, through a preparatory class that teaches illness management and recovery, self-advocacy, self-organization, personal budget, etc. (12-14) *        | Informal and experience-based: learning from own and peers' experience                                                                                      |
| Main group activities                          |                         | Group responsibilities and chores; maintaining learning groups; searching for employment                                                                   |                                                                                                                                                             |
|                                                |                         | A preparatory 'coping skills' class held 4 days/week                                                                                                       | Operating and promoting the program; afternoon get-togethers and periodic excursions (16)                                                                   |
| Program locale                                 |                         | A separate department for young adults in a rehabilitation center for people with SMI (4, 11, 16, 17)                                                      | Public community facilities (e.g., general-purpose community club) (18)                                                                                     |
| Social activities within surrounding community |                         | Rare                                                                                                                                                       | Regularly attending community club activities (18)                                                                                                          |
| Housing                                        |                         | With parents                                                                                                                                               | Protected shared housing with dormitory-like conditions (10)                                                                                                |
| Integration within the program                 |                         | Gradual and supportive, including an introductory first week (4, 14)                                                                                       | Immediate #                                                                                                                                                 |
| Staff's contact with parents                   |                         | Continuous                                                                                                                                                 | Minimal                                                                                                                                                     |
| Supported employment                           | General approach        | All participants are employed in paid, competitive, open-market jobs (7, 19, 20)                                                                           |                                                                                                                                                             |
|                                                | Working days/ week      | 1                                                                                                                                                          | 5                                                                                                                                                           |
|                                                | Maintaining a workplace | A 'sampling method': 3 workplaces, 4-5 months each (4, 14)                                                                                                 | Long-term: 1 workplace throughout the year (7, 21)                                                                                                          |
|                                                | Vocational advisor      | Regular intervention, as requested by participant (4, 8, 17, 19)                                                                                           | Rare intervention, only when required (7)                                                                                                                   |
|                                                | Employer                | Employer always aware of the program                                                                                                                       | Employer rarely aware of the program                                                                                                                        |
| Personal support by staff                      |                         | Close and continuous                                                                                                                                       | Minimal; at own initiative                                                                                                                                  |
| Psychiatric support                            |                         | Readily available (4, 6, 10, 11, 17)                                                                                                                       | At own initiative and expense #                                                                                                                             |
| Graduation criteria                            |                         | Between 1 and 1.5 years after joining the program (depending on progress)                                                                                  |                                                                                                                                                             |
| Continuation component                         |                         | No continuation component *                                                                                                                                | Phase II: graduates can continue attending learning and social activities and maintain relationships with peers (21)                                        |

\* Component changed to a more DMP-like orientation due to evaluative feedback

# Component changed to a more SMP-like orientation due to evaluative feedback

**Supplementary Table 2: Demographic data and program statistics**

|                              |                                                                                                   | SMP                      | DMP             |         |
|------------------------------|---------------------------------------------------------------------------------------------------|--------------------------|-----------------|---------|
| <b>Participants</b>          | N                                                                                                 | 53                       | 29              |         |
|                              | Age at recruitment (years) <sup>1***</sup>                                                        | 23.4 ± 3.2               | 19.5 ± .9       |         |
|                              | Duration of stay (months) <sup>1†</sup>                                                           | 11.3 ± 5.5               | 10.2 ± 5.4      |         |
|                              | Gender (% females) †                                                                              | 38%                      | 48%             |         |
|                              | High-school diploma †                                                                             | 32%                      | 27%             |         |
| <b>Program statistics</b>    | Participants recruited                                                                            | First year               | 25              | 14      |
|                              |                                                                                                   | Second year              | 28              | 15      |
|                              |                                                                                                   | Total                    | 53              | 29      |
|                              | Participants dropping-out                                                                         | First year*              | 1 (4%)          | 5 (36%) |
|                              |                                                                                                   | Second year <sup>†</sup> | 1 (4%)          | 1 (7%)  |
|                              |                                                                                                   | Total**                  | 2 (4%)          | 6 (21%) |
|                              | Participants hospitalized (first and second years)*                                               | 13 (25%)                 | 1 (4%)          |         |
| <b>Follow-up<sup>2</sup></b> | Working in a normative framework                                                                  | 6 (15%)                  | 4 (25%)         |         |
|                              | Studying in a normative academic framework                                                        | 2 (5%)                   | 4 (25%)         |         |
|                              | Continuing to Phase II (normative working or studying framework and attending program activities) | N/A                      | 7 (44%)         |         |
|                              | Searching for a job through an 'employment club'                                                  | 3 (7%)                   | 0 (0%)          |         |
|                              | Supported employment                                                                              | 12 (29%)                 | 1 (6%)          |         |
|                              | Transitional employment                                                                           | 6 (14%)                  | 0 (0%)          |         |
|                              | Unemployed                                                                                        | 12 (29%)                 | 0 (0%)          |         |
|                              | <b>Overall integrated within normative adult frameworks<sup>***</sup></b>                         | <b>8 (20%)</b>           | <b>15 (94%)</b> |         |

<sup>1</sup> Mean ± Standard Deviation

<sup>2</sup> Data available for 41 SMP participants and 16 DMP participants; obtained January 2012

\* p<.05, \*\* p<.01, \*\*\* p<.001, † Not significantly different between groups (Chi-square test).

**Supplementary Table 3: Self-reported contribution of different program components to the rehabilitation process**

| Program component                 | SMP<br>(N=29) |      | DMP<br>(N=19) |      | Two-Way Repeated Measures ANOVA |            |             |       |
|-----------------------------------|---------------|------|---------------|------|---------------------------------|------------|-------------|-------|
|                                   | M             | SD   | M             | SD   | Program                         | Time       | Interaction | df    |
| <b>Overall contribution</b>       |               |      |               |      |                                 |            |             |       |
| First measurement                 | 2.86          | .88  | 2.95          | 1.18 | F=.68                           | F=.27      | F=.18       | 1, 46 |
| Last measurement                  | 2.88          | .98  | 3.13          | .78  |                                 |            |             |       |
| <b>One-on-one meetings</b>        |               |      |               |      |                                 |            |             |       |
| First measurement                 | 2.72          | .92  | 2.63          | 1.30 | F=.14                           | F=1.89     | F=.01       | 1, 46 |
| Last measurement                  | 2.98          | .85  | 2.92          | .85  |                                 |            |             |       |
| <b>Learning at group meetings</b> |               |      |               |      |                                 |            |             |       |
| First measurement                 | 2.69          | .93  | 2.47          | 1.17 | F=.04                           | F=4.23*    | F=1.28      | 1, 46 |
| Last measurement                  | 2.83          | .88  | 2.95          | .71  |                                 |            |             |       |
| <b>Work experience</b>            |               |      |               |      |                                 |            |             |       |
| First measurement                 | 1.46          | 1.64 | 2.76          | 1.38 | F=9.81**                        | F=11.49*** | F=2.11      | 1, 45 |
| Last measurement                  | 2.71          | 1.21 | 3.26          | .73  |                                 |            |             |       |
| <b>Social activities</b>          |               |      |               |      |                                 |            |             |       |
| First measurement                 | 2.21          | 1.29 | 2.79          | 1.32 | F=2.75                          | F=4.04*    | F=.65       | 1, 45 |
| Last measurement                  | 2.77          | .79  | 3.03          | .79  |                                 |            |             |       |

\*p<.05; \*\*p<.01; \*\*\*p<.001

**Supplementary Table 4: Self-perceived sense of mental wellbeing**

| Measure of<br>Mental Wellbeing      | SMP<br>(N=28) |     | DMP<br>(N=19) |      | Two-Way Repeated Measures ANOVA |         |             |       |
|-------------------------------------|---------------|-----|---------------|------|---------------------------------|---------|-------------|-------|
|                                     | M             | SD  | M             | SD   | Program                         | Time    | Interaction | df    |
| <b>Personal confidence and hope</b> |               |     |               |      |                                 |         |             |       |
| First measurement                   | 3.68          | .69 | 3.59          | .92  | F=.25                           | F=5.44* | F=.01       | 1, 45 |
| Last measurement                    | 3.94          | .55 | 3.87          | .55  |                                 |         |             |       |
| <b>Willingness to ask for help</b>  |               |     |               |      |                                 |         |             |       |
| First measurement                   | 3.79          | .89 | 3.45          | 1.01 | F=.75                           | F=.86   | F=1.14      | 1, 45 |
| Last measurement                    | 3.76          | .71 | 3.78          | .62  |                                 |         |             |       |
| <b>Goal and success orientation</b> |               |     |               |      |                                 |         |             |       |
| First measurement                   | 3.75          | .60 | 4.07          | .99  | F=3.04                          | F=1.23  | F=.31       | 1, 45 |
| Last measurement                    | 3.99          | .52 | 4.15          | .58  |                                 |         |             |       |
| <b>Reliance on others</b>           |               |     |               |      |                                 |         |             |       |
| First measurement                   | 4.02          | .49 | 3.69          | 1.00 | F=3.09                          | F=.40   | F=.22       | 1, 45 |
| Last measurement                    | 4.04          | .59 | 3.85          | .70  |                                 |         |             |       |
| <b>Not dominated by symptoms</b>    |               |     |               |      |                                 |         |             |       |
| First measurement                   | 3.08          | .91 | 3.96          | .70  | F=6.77*                         | F=1.61  | F=6.02*     | 1, 45 |
| Last measurement                    | 3.56          | .96 | 3.80          | .66  |                                 |         |             |       |

\*p<.05

**Supplementary Table 5: Self-reported work performance**

| Performance measure                    | SMP<br>(N=29) |      | DMP<br>(N=19) |      | Two-Way Repeated Measures ANOVA |            |             |       |
|----------------------------------------|---------------|------|---------------|------|---------------------------------|------------|-------------|-------|
|                                        | M             | SD   | M             | SD   | Program                         | Time       | Interaction | df    |
| <b>General performance</b>             |               |      |               |      |                                 |            |             |       |
| First measurement                      | 2.18          | 1.24 | 4.34          | .47  | F=26.39***                      | F=41.71*** | F=62.64***  | 1, 45 |
| Last measurement                       | 4.43          | .55  | 4.11          | .25  |                                 |            |             |       |
| <b>Arriving to work independently</b>  |               |      |               |      |                                 |            |             |       |
| First measurement                      | 2.14          | 1.55 | 4.44          | .86  | F=18.29***                      | F=33.29*** | F=27.83***  | 1, 45 |
| Last measurement                       | 4.62          | 1.05 | 4.56          | .71  |                                 |            |             |       |
| <b>Arriving to work on time</b>        |               |      |               |      |                                 |            |             |       |
| First measurement                      | 1.97          | 1.30 | 4.39          | .85  | F=26.61***                      | F=29.57*** | F=47.95***  | 1, 45 |
| Last measurement                       | 4.28          | .80  | 4.11          | .58  |                                 |            |             |       |
| <b>Going to work regularly</b>         |               |      |               |      |                                 |            |             |       |
| First measurement                      | 2.15          | 1.41 | 4.67          | .69  | F=30.59***                      | F=38.35*** | F=42.03***  | 1, 42 |
| Last measurement                       | 4.58          | .81  | 4.61          | .61  |                                 |            |             |       |
| <b>Looking presentable</b>             |               |      |               |      |                                 |            |             |       |
| First measurement                      | 1.79          | 1.59 | 4.56          | .78  | F=33.18***                      | F=46.05*** | F=42.69***  | 1, 45 |
| Last measurement                       | 4.72          | .65  | 4.61          | .70  |                                 |            |             |       |
| <b>Reporting absences</b>              |               |      |               |      |                                 |            |             |       |
| First measurement                      | 2.32          | 1.49 | 4.78          | .55  | F=38.90***                      | F=14.65*** | F=25.62***  | 1, 44 |
| Last measurement                       | 4.32          | .86  | 4.50          | .62  |                                 |            |             |       |
| <b>Justified absences</b>              |               |      |               |      |                                 |            |             |       |
| First measurement                      | 2.00          | 1.58 | 4.00          | 1.03 | F=36.69***                      | F=33.54*** | F=36.69***  | 1, 41 |
| Last measurement                       | 4.48          | .77  | 3.94          | .80  |                                 |            |             |       |
| <b>Asking for help</b>                 |               |      |               |      |                                 |            |             |       |
| First measurement                      | 2.38          | 1.20 | 4.61          | .50  | F=23.71***                      | F=16.61*** | F=47.11***  | 1, 42 |
| Last measurement                       | 4.35          | .80  | 4.11          | .76  |                                 |            |             |       |
| <b>Carrying out instructions</b>       |               |      |               |      |                                 |            |             |       |
| First measurement                      | 2.28          | 1.37 | 4.03          | .55  | F=8.54**                        | F=21.92*** | F=28.65***  | 1, 41 |
| Last measurement                       | 4.36          | .86  | 3.89          | .76  |                                 |            |             |       |
| <b>Supervisor's satisfaction</b>       |               |      |               |      |                                 |            |             |       |
| First measurement                      | 2.14          | 1.46 | 4.25          | .91  | F=3.85                          | F=9.63**   | F=53.51***  | 1, 44 |
| Last measurement                       | 4.41          | .95  | 3.33          | .97  |                                 |            |             |       |
| <b>Contribution to self confidence</b> |               |      |               |      |                                 |            |             |       |
| First measurement                      | 2.76          | 1.74 | 3.67          | 1.03 | F=.12                           | F=4.61*    | F=8.75**    | 1, 41 |
| Last measurement                       | 4.16          | 1.11 | 3.44          | .86  |                                 |            |             |       |

\*p<.05; \*\*p<.01; \*\*\*p<.001

## References

1. Corrigan PW, Salzer M, Ralph RO, et al.: Examining the factor structure of the recovery assessment scale. *Schizophrenia Bull* 30:1035-41, 2004
2. Burt KB, Masten AS: Development in the transition to adulthood: Vulnerabilities and opportunities; in *Young Adult Mental Health*. Edited by Grant JE, Potenza MN. New York: Oxford University Press, 2010
3. Davis M, Koroloff N, Ellison ML: Between adolescence and adulthood: rehabilitation research to improve services for youth and young adults. *Psychiatric rehabilitation journal* 35:167-70, 2012
4. McGorry P, Bates T, Birchwood M: Designing youth mental health services for the 21st century: examples from Australia, Ireland and the UK. *The British Journal of Psychiatry* 202:s30-s5, 2013
5. McGuire AB, Kukla M, Green A, et al.: Illness management and recovery: a review of the literature. *Psychiatric services* 65:171-9, 2014
6. Addington DE, McKenzie E, Norman R, et al.: Essential evidence-based components of first-episode psychosis services. *Psychiatric services* 64:452-7, 2013
7. Bond GR, Drake RE, Campbell K: Effectiveness of individual placement and support supported employment for young adults. *Early intervention in psychiatry*, 2014
8. Brodie I, Excellence SCIf, Goldman R, et al.: *Mental Health Service Transitions for Young People*, 2011
9. National Collaborative on Workforce and Disability: Successful Transition Models for Youth with Mental Health Needs: A Guide for Workforce Professionals; in *InfoBrief*. Washington, D.C.: National Collaborative on Workforce and Disability for Youth, Institute for Educational Leadership, 2009
10. United States. Government Accountability O: Young adults with serious mental illness [electronic resource] : some states and federal agencies are taking steps to address their transition challenges : report to congressional requesters. [Washington, D.C.]: U.S. Govt. Accountability Office, 2008
11. Woolsey L, Katz-Leavy J: *Transitioning Youth With Mental Health Needs to Meaningful Employment & Independent Living*. Washington, DC: National Collaborative on Workforce and Disability for Youth, Institute for Educational Leadership, 2008
12. Whitley R, Siantz E: Best practices: recovery centers for people with a mental illness: an emerging best practice? *Psychiatric services* 63:10-2, 2012
13. Whitley R, Strickler D, Drake RE: Recovery centers for people with severe mental illness: a survey of programs. *Community mental health journal* 48:547-56, 2012
14. Podmostko M: *Tunnels and cliffs: A guide for workforce development practitioners and policymakers serving youth with mental health needs*. Washington, DC: National Collaborative on Workforce and Disability for Youth, Institute for Educational Leadership, 2007
15. Daniels AS, Cate R, Bergeson S, et al.: Level-of-care criteria for peer support services: a best-practice guide. *Psychiatric services* 64:1190-2, 2013
16. McKay CE, Osterman R, Shaffer J, et al.: Adapting services to engage young adults in ICCD clubhouses. *Psychiatric rehabilitation journal* 35:181-8, 2012
17. Patel V, Flisher AJ, Hetrick S, et al.: Mental health of young people: a global public-health challenge. *Lancet* 369:1302-13, 2007
18. Dragatsi D, Bradford JM, Holderness CC, et al.: The Washington Heights Community Service model: positive outcomes and implications for reimbursement under the ACA. *Psychiatric services* 65:284-6, 2014
19. Burke-Miller J, Razzano LA, Grey DD, et al.: Supported employment outcomes for transition age youth and young adults. *Psychiatric rehabilitation journal* 35:171-9, 2012
20. Marshall T, Goldberg RW, Braude L, et al.: Supported employment: assessing the evidence. *Psychiatric services* 65:16-23, 2014
21. Davis M, Delman J, Duperoy T: Employment and Careers in Young Adults with Psychiatric Disabilities; in *Tools for system transformation for young adults with psychiatric disabilities: State of the science papers*. Edited by Davis M. Worcester, MA: University of Massachusetts Medical School, Department of Psychiatry, Center for Mental Health Services Research, Transitions RTC, 2013
